# Supplementary material
Source: publisher figshare collection journal article supplement (https://sage.figshare.com/ndownloader/files/38308179)
Supplement: Supplementary file 1 [file 38308179]

**APPENDIX: Preoperative Risk Factors of Subsequent Ipsilateral ACL Revision Surgery following an ACL Restoration Procedure**

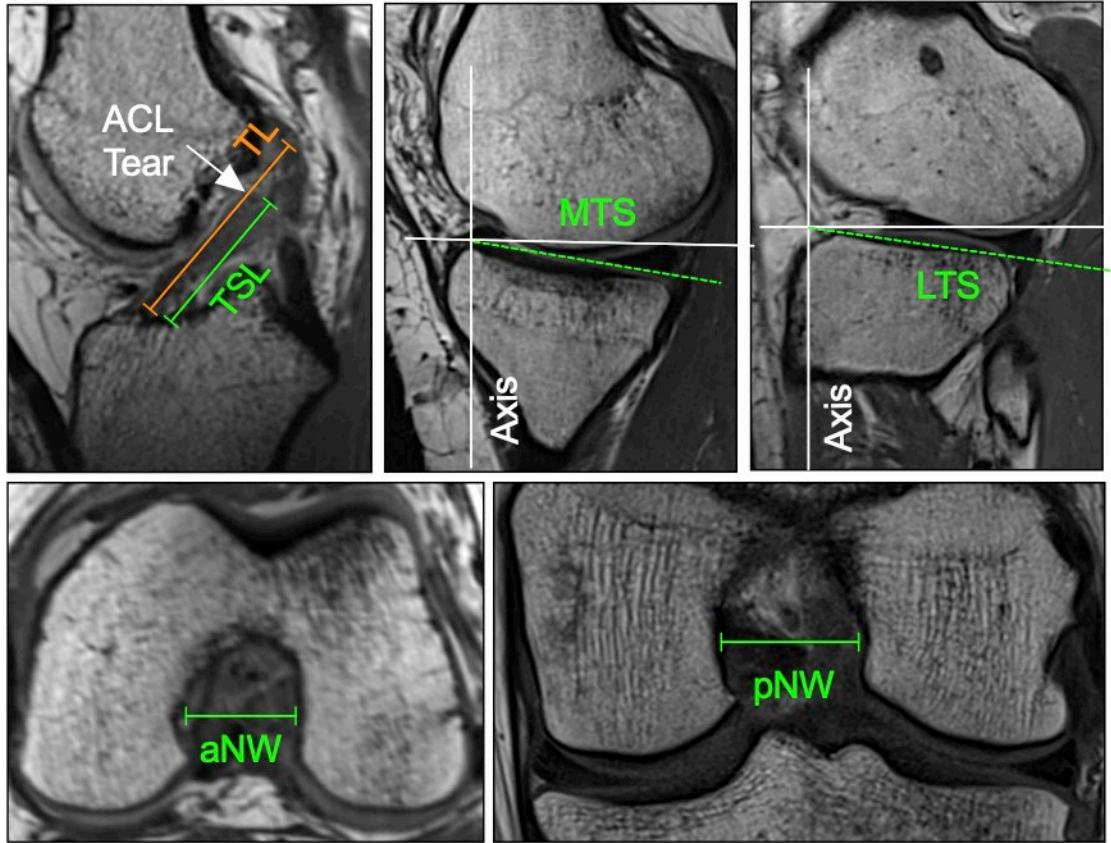

**Figure A1.** Measurement techniques used to quantify tibial stump length (TSL) as a percentage of total ACL length (TL), posterior slope of the medial (MTS) and lateral (LTS) tibial plateau, anterior (aNW) and posterior (pNW) notch width.

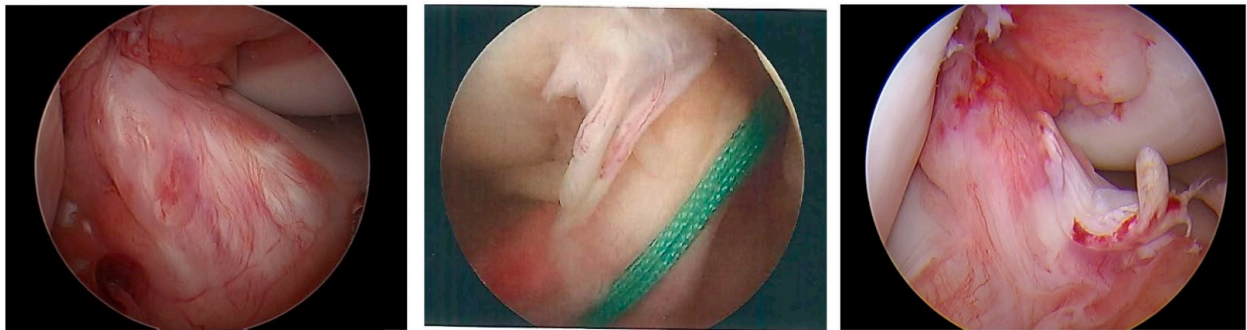

**Figure A2.** Representative arthroscopic images of bridge-enhanced ACL restoration.

**Table A1.** Breakdown of the baseline characteristics between patients with and without revision surgery.

| Characteristic                                             | No Revision<br>N=105 | Revision<br>N=18 |
|------------------------------------------------------------|----------------------|------------------|
| Demographics                                               |                      |                  |
| Female, no. (%)                                            | 56 (53%)             | 11 (61%)         |
| White, Non-Hispanic, no. (%)                               | 82 (78%)             | 16 (89%)         |
| Age ( <i>years</i> ), median (IQR)                         | 18 (16-23)           | 16 (15-17)       |
| Weight ( <i>kg</i> ), mean $\pm$ SD                        | 70.9 $\pm$ 13.2      | 66.0 $\pm$ 19.3  |
| BMI ( <i>kg/m<sup>2</sup></i> ), mean $\pm$ SD             | 24.1 $\pm$ 3.2       | 22.6 $\pm$ 4.1   |
| Contact injury, no. (%)                                    | 23 (22%)             | 8 (44%)          |
| Level 1 sport, no. (%)                                     | 74 (71%)             | 13 (72%)         |
| Baseline PROs                                              |                      |                  |
| IKDC subjective score, mean $\pm$ SD                       | 46.8 $\pm$ 14.9      | 45.3 $\pm$ 15.0  |
| Marx score, median (IQR) <sup>a</sup>                      | 16 (12-16)           | 16 (14-16)       |
| Surgery                                                    |                      |                  |
| Injury to surgery ( <i>days</i> ), mean $\pm$ SD           | 35.1 $\pm$ 8.9       | 32.7 $\pm$ 10.1  |
| Pre-op pivot shift grade, no. (%)                          |                      |                  |
| 0                                                          | 1 (1%)               | 0 (0%)           |
| 1                                                          | 25 (24%)             | 2 (11%)          |
| 2                                                          | 68 (65%)             | 14 (78%)         |
| 3                                                          | 11 (10%)             | 2 (11%)          |
| Pre-op hyperextension ( $\geq 5$ <i>degrees</i> ), no. (%) | 24 (23%)             | 7 (39%)          |
| Medial meniscus tear, no. (%)                              | 12 (11%)             | 3 (17%)          |
| Lateral meniscus tear, no. (%)                             | 32 (30%)             | 8 (44%)          |
| Pre-op MRI Characteristics                                 |                      |                  |
| Tibial stump length (%), mean $\pm$ SD                     | 55.0 $\pm$ 10.8      | 49.1 $\pm$ 13.6  |
| Anterior notch width ( <i>mm</i> ), mean $\pm$ SD          | 19.1 $\pm$ 2.4       | 18.0 $\pm$ 2.1   |
| Posterior notch width ( <i>mm</i> ), mean $\pm$ SD         | 18.5 $\pm$ 2.7       | 17.5 $\pm$ 1.6   |
| LTS ( <i>degrees</i> ), mean $\pm$ SD                      | 6.3 $\pm$ 2.6        | 7.5 $\pm$ 3.6    |
| MTS ( <i>degrees</i> ), mean $\pm$ SD                      | 5.1 $\pm$ 2.4        | 6.5 $\pm$ 2.7    |

LTS=lateral tibial slope, MTS=medial tibial slope
